# Supplementary material for: Meta-Analysis of Risk Stratification of SCN5A With Brugada Syndrome: Is SCN5A Always a Marker of Low Risk?
Source: PubMed Central journal article supplement (PMC6389868; doi:10.3389/fphys.2019.00103), 2019-02-19
Supplement: Image_1.pdf [file Image_1.pdf]

## Supplementary

**Figure 1.** Odds ratio for the occurrence of arrhythmic events during follow-up among BrS patients who

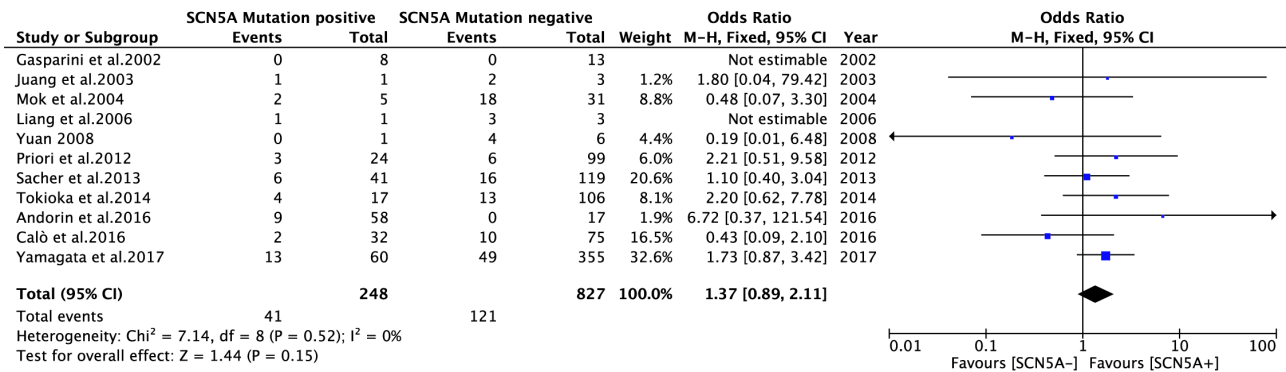

underwent *SCN5A* gene mutation test.
